# Supplementary material for: Temperature−Dependent Raman Scattering Investigation on vdW Epitaxial PbI2/CrOCl Heterostructure
Source: MDPI journal article supplement (doi:10.3390/cryst13010104), 2023-01-06
Supplement: s1 [file s1]

# Supporting Information

## Temperature-dependent Raman scattering investigation on vdW epitaxial $\text{PbI}_2/\text{CrOCl}$ heterostructure

Siwen You <sup>a,#</sup>, Xiao Guo <sup>a,#</sup>, Junjie Jiang <sup>a</sup>, Dingbang Yang <sup>a</sup>, Mingjun Li<sup>a</sup>, Fangping Ouyang <sup>a,b</sup>,  
Haipeng Xie <sup>a</sup>, Han Huang <sup>a,\*</sup>, Yongli Gao <sup>c</sup>

<sup>a</sup> Hunan Key Laboratory of Super-microstructure and Ultrafast Process, School of Physics and Electronics, Central South University, Changsha 410083, P. R. China.

<sup>b</sup> School of Physics and Technology, Xinjiang University, Urumqi 830046, People's Republic of China

<sup>c</sup> Department of Physics and Astronomy, University of Rochester, Rochester, New York 14627, United States.

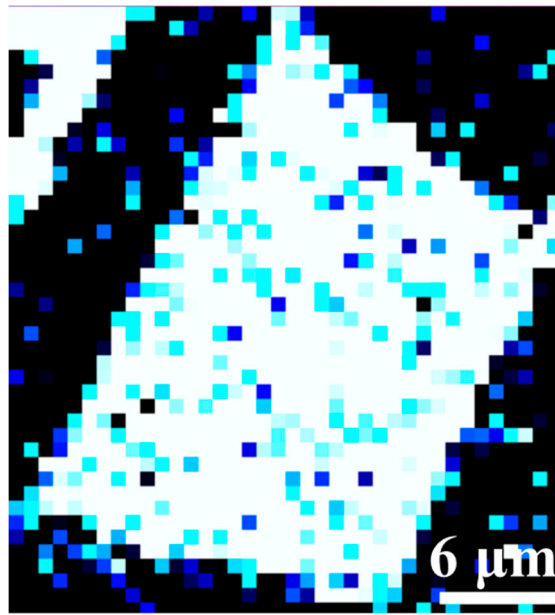

Figure S1 Raman intensity mapping image of  $A_g^1$  mode of exfoliated CrOCl nanoflake.

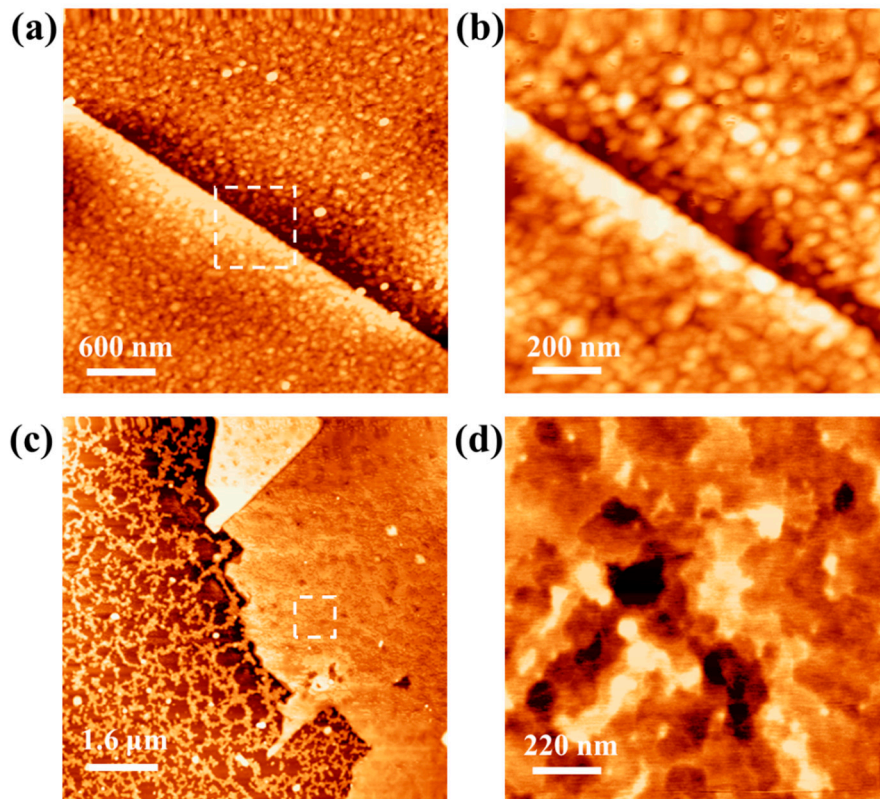

Figure S2 AFM images of PbI<sub>2</sub> films annealed at 373 K (a) and 473 K (c) after deposited at room temperature. (b, d) The corresponding high-resolution images from the white square area inside the figure (a, c), respectively.

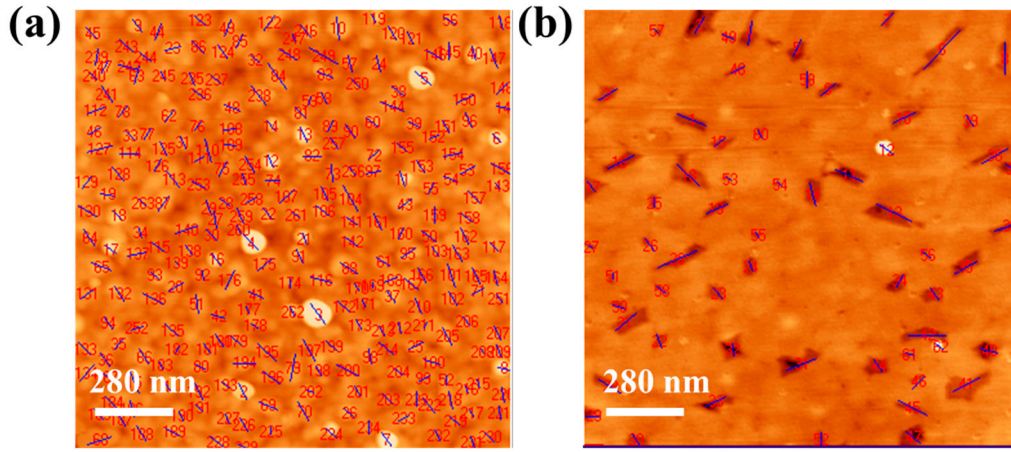

**Number of grains: 263**

**Number of defects: 62**

Figure S3 AFM image of  $\text{PbI}_2/\text{CrOCl}$  heterostructure which deposited at room temperature (a) and annealed after deposited (b), the number of grain and defects are highlighted inside either.

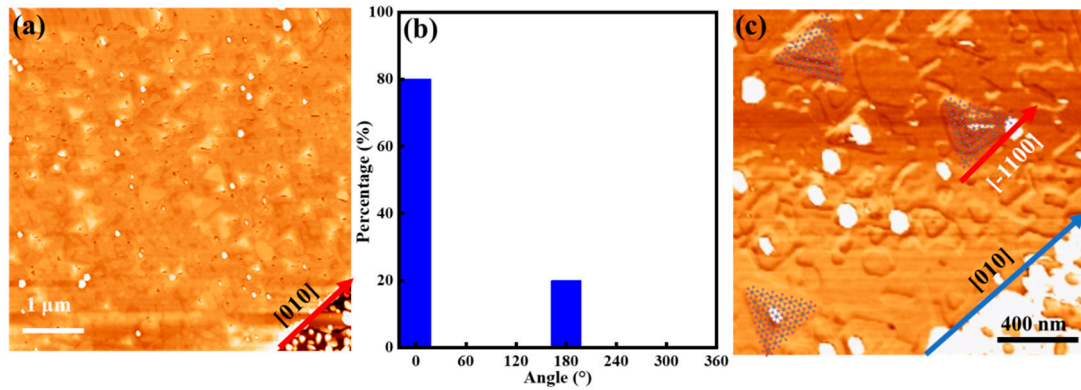

Figure S4 (a) AFM image of  $\text{PbI}_2/\text{CrOCl}$  heterostructure deposited at 423 K, the triangular islands show the same orientation. (b) Statistical diagram of the orientation of  $\text{PbI}_2$  triangular islands. (c) Phase image of  $\text{PbI}_2/\text{CrOCl}$  heterostructure showing triangular islands, the  $[\bar{1}100]$  direction of  $\text{PbI}_2$  mostly along the  $[010]$  direction of  $\text{CrOCl}$  nanoflake.

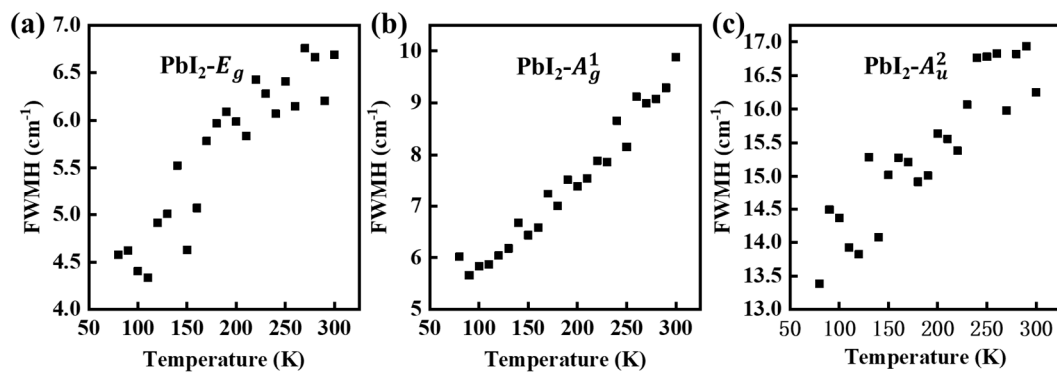

Figure S5 FWHM of  $E_g$  (a),  $A_g^1$  (b) and  $A_u^2$  (c) modes at temperature dependent Raman spectra. Each FWHM is linearly broadened as the temperature increasing.
